# Supplementary material
Source: PubMed Central journal article supplement (PMC3963495)
Supplement: NIHMS542011-supplement-01.pdf [file NIHMS542011-supplement-01.pdf]

# Supplemental Information

## Supplemental Figures

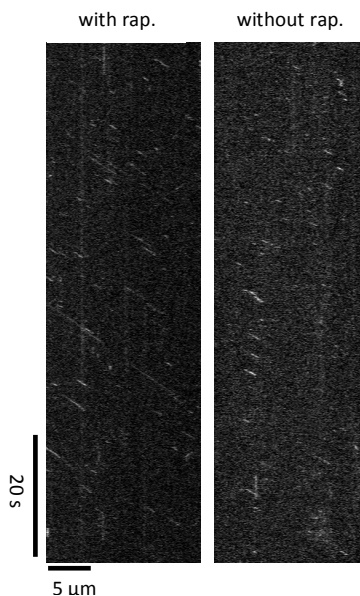

**Figure S1:** Kymograph of single molecule run length measurements for results displayed in Figure 2D. 1 nM Kin2GFPFRB was mixed with 20 nM EB1FKBP in the absence or presence of 100 nM rapamycin.

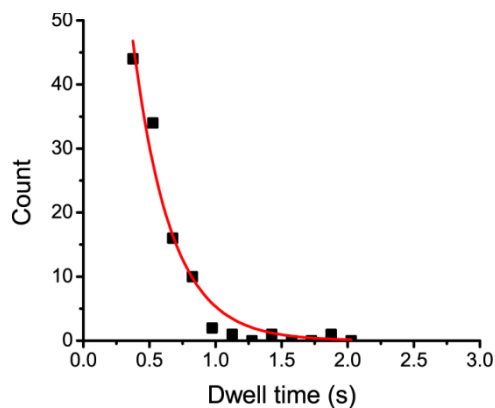

**Figure S2:** Duration of EB1<sub>GFP</sub> binding events on GTP $\gamma$ S microtubules in assay buffer without added KCl and KAc,. EB1<sub>GFP</sub> concentration was 1 nM, and buffer was 80 mM K-PIPES, 1 mM EGTP, 4 mM MgCl<sub>2</sub>, pH 6.8. Data were fit to an exponential (red line) giving an average dwell time of  $0.288 \pm 0.28$  s (mean  $\pm$  SE of fit, N = 109). These data can be compared to dwell times of quantum dot-functionalized EB1 off-rates in normal assay buffer, shown in Figure 3C.

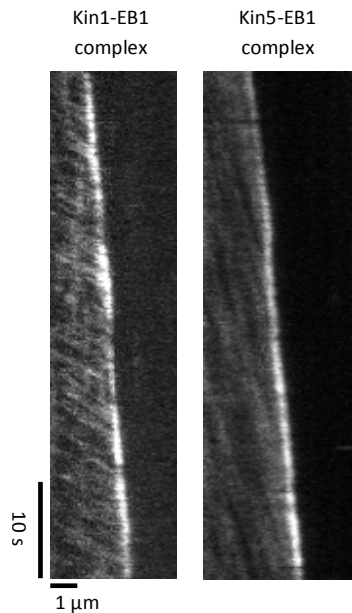

**Figure S3:** Kymograph of kin1-EB1 and kin5-EB1 tracks on dynamic microtubules. Experimental conditions were same as in Figure 4. Contrasting motor velocities can be seen by the different slopes of the single-motor tracks.

## Supplemental Movies

**Movie S1:** Microtubule steering by  $EB1_{FKBP}$ -kin2GFP<sub>FRB</sub> complex, related to Figure 3A. EB1: rapamycin: kinesin were used at a ratio of 10:10:1 with a kin2GFP<sub>FRB</sub> concentration of 250 nM. Video was acquired using TIRF microscopy at 5 fps. The  $EB1_{FKBP}$ -kin2GFP<sub>FRB</sub> complex highlights the growing microtubule plus-ends and during an encounter the plus-end of the growing microtubule is steered towards the plus-end of the immobilized microtubule.

**Movie S2:** Microtubule steering by  $EB1_{FKBP}$ -kin2GFP<sub>FRB</sub> complex, related to Figure 3B. The video is from an independent experiment using conditions identical to Movie S1.

**Movie S3:** Microtubule steering by  $EB1_{FKBP}$ -kin1GFP<sub>FRB</sub> complex, related to Figure 4B. Experimental conditions are the same as described in Movie S1 except 200 nM of kin1GFP<sub>FRB</sub> was used. Similar steering of growing microtubule plus-ends was observed, confirming that kin1 also has the ability to steer growing microtubules when complexed to EB1.

**Movie S4:** Microtubule steering by  $EB1_{FKBP}$ -kin5GFP<sub>FRB</sub> complex, related to Figure 4C. Experimental conditions are the same as described in Movie S1, except 25 nM of kin5GFP<sub>FRB</sub> was used. In this movie the growing microtubule plus-end changes direction as it hits another microtubule laterally.

**Movie S5:** Negative control showing microtubule cross-over event in the absence of EB1. Related to Figure 3. Experiment was performed using conditions identical to Movie S3, but without EB1<sub>FKBP</sub>. Microtubules are labeled weakly by moving kin1GFP<sub>FRB</sub> motors (200 nM), and no accumulation is observed at growing plus-ends. Note that encounters consist of microtubules crossing over one another without observable bending. Movie is 4x real time.

## Supplemental Experimental Procedures

### Cloning and protein expression

To make kin1, *Drosophila* conventional kinesin was truncated at position 559 and eGFP, FRB and a His<sub>6</sub> tag were added to the C-terminal sequentially. Kin2 was cloned by swapping the mouse KIF3A head and neck-linker into kin1 as previously described [1]. Kin5 was engineered by swapping head and neck-linker of XIKSP into kin1 and shortening the neck-linker to 14 aa as previously described [2]. Human EB1 was fused to FKBP and a His<sub>6</sub> tag at the C-terminal. All motors were expressed in bacteria and purified by Ni column chromatography as previously described [3], frozen in liquid N<sub>2</sub>, and stored at -80°C in storage buffer (50 mM K-phosphate, 300 mM NaCl, 2 mM MgCl<sub>2</sub>, 100 μM ATP, 10 mM β-mercaptoethanol, 500 mM imidazole, pH = 7.2, with 10% sucrose added). EB1 was expressed and purified similarly, except that expression was induced with 0.5 mM IPTG and grown overnight at 23°C. The cell pellet was resuspended in ice-cold buffer B (50 mM K-phosphate, 400 mM NaCl, 2 mM MgCl<sub>2</sub>, 10 mM β-mercaptoethanol, pH 7.2) [4]. EB1 storage buffer consisted of 50 mM K-phosphate, 400 mM NaCl, 1 mM MgCl<sub>2</sub>, 100 μM ATP, 5 mM DTT, pH = 7.0, with 10% sucrose added. At the highest concentrations used, EB1 and kinesin comprised 4% and 2.5% of the final volume, respectively; single-molecule investigations were carried out at concentrations 100-fold lower.

### Microscopy assays and curve fitting

All experiments were carried out in assay buffer (80 mM K-Pipes, 85 mM KCl, 85 mM potassium-acetate, 1 mM EGTA, 4 mM MgCl<sub>2</sub>, pH 6.8). Flow cells were assembled by attaching OTS-coated coverslips to glass slides with double-sided tape. The flow cell was first coated with 0.5 mg/ml neutravidin and blocked by 5% Pluronic F108 at room temperature. Then, the flow cell was incubated with Cy5- and biotin-labeled GMPCPP microtubules seeds at 35°C. Microtubule polymerization was initiated by flowing in a buffer containing 20 μM free tubulin in assay buffer supplemented with 0.1% methyl cellulose, casein, 1 mM GTP, 1 mM MgCl<sub>2</sub>, oxygen scavengers (glucose, glucose oxidase, catalase, β-mercaptoethanol) and proteins to be assayed. Flow cell temperature was maintained at 32°C through an objective heater.

Run length and dwell time data were fit to single exponentials with no offset using Origin software.

To calculate tip/wall fluorescence ratio in Figure 4D, two line scans, were made perpendicular to the microtubules at the tip of microtubule and 1 $\mu$ m away from the tip, respectively. Peak intensities above the background were used to calculate the ratio.

### Analytical gel filtration

A 300  $\mu$ L sample of 5  $\mu$ M kin2GFP<sub>FRB</sub> and 25  $\mu$ M of EB1<sub>FKBP</sub> in assay buffer supplemented with 25  $\mu$ M rapamycin was incubated on ice for 15 minutes before loading on to a Superdex 200 10/300 GL column (GE Healthcare). The fractions were eluted in assay buffer containing 1  $\mu$ M rapamycin, 0.5 mL were fractions collected, and the absorbance monitored at 280 nm. SDS-PAGE gels were Coomassie stained, band intensities analyzed in ImageJ, and stoichiometries calculated by dividing each band intensity by its molecular weight.

### Supplemental References

- S1. Shastry, S., and Hancock, W.O. (2010). Neck linker length determines the degree of processivity in kinesin-1 and kinesin-2 motors. *Curr Biol* 20, 939-943.
- S2. Shastry, S., and Hancock, W.O. (2011). Interhead tension determines processivity across diverse N-terminal kinesins. *Proc Natl Acad Sci U S A* 108, 16253-16258.
- S3. Hancock, W.O., and Howard, J. (1998). Processivity of the motor protein kinesin requires two heads. *J Cell Biol* 140, 1395-1405.
- S4. Bieling, P., Kandels-Lewis, S., Telley, I.A., van Dijk, J., Janke, C., and Surrey, T. (2008). CLIP-170 tracks growing microtubule ends by dynamically recognizing composite EB1/tubulin-binding sites. *J Cell Biol* 183, 1223-1233.
